# Supplementary material for: Robust and transparent membrane of crystalline silicone via a melt-drawing technique
Source: Royal Society of Chemistry journal article supplement (doi:10.1039/c3tc31265h), 2013-10-16
Supplement: c3tc31265h.pdf [file c3tc31265h.pdf]

## Electronic Supplementary Information

# Robust and Transparent Membrane of Crystalline Silicone via Melt-Drawing Technique

Hiroki Uehara,<sup>\*a</sup> Tomohiro Obana,<sup>a</sup> Masaki Kakiage,<sup>a,b</sup> Hidekazu Tanaka,<sup>a</sup> Hiroyasu Masunaga,<sup>c</sup> Takeshi Yamanobe,<sup>a</sup> and Eiichi Akiyama<sup>\*d</sup>

<sup>a</sup>Division of Molecular Science, Faculty of Science and Technology, Gunma University, Kiryu, Gunma 376-8515, Japan; E-mail: hirokiuehara@gunma-u.ac.jp

<sup>b</sup>Present address: Department of Applied Chemistry, Saitama University, 255 Shimo-Okubo, Sakura-ku, Saitama 338-8570, Japan

<sup>c</sup>Japan Synchrotron Radiation Research Institute, Sayo, Hyogo 679-5198, Japan

<sup>d</sup>Sagami Chemical Research Institute, 2743-1 Hayakawa, Ayase, Kanagawa 252-1193, Japan; E-mail: akiyama@sagami.or.jp

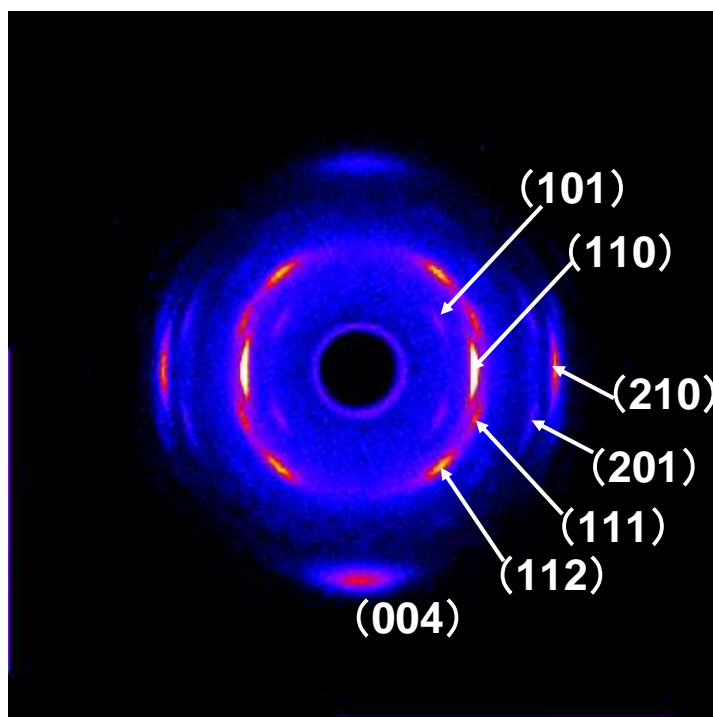

**Fig S1.** An enlarged WAXD pattern for the membrane roll-drawn at 140°C with the reflection indexes.

Roll-drawing direction is vertical.

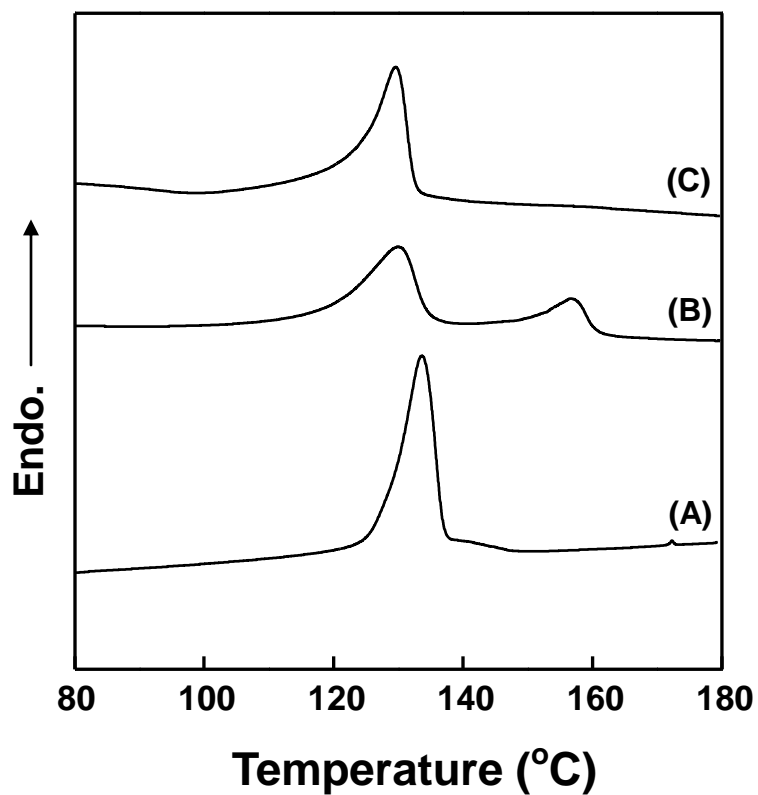

**Fig S2** DSC curves for the membranes roll-drawn at 120°C (A), 140°C (B) and 160°C (C). The heating rate was 2°C/min.

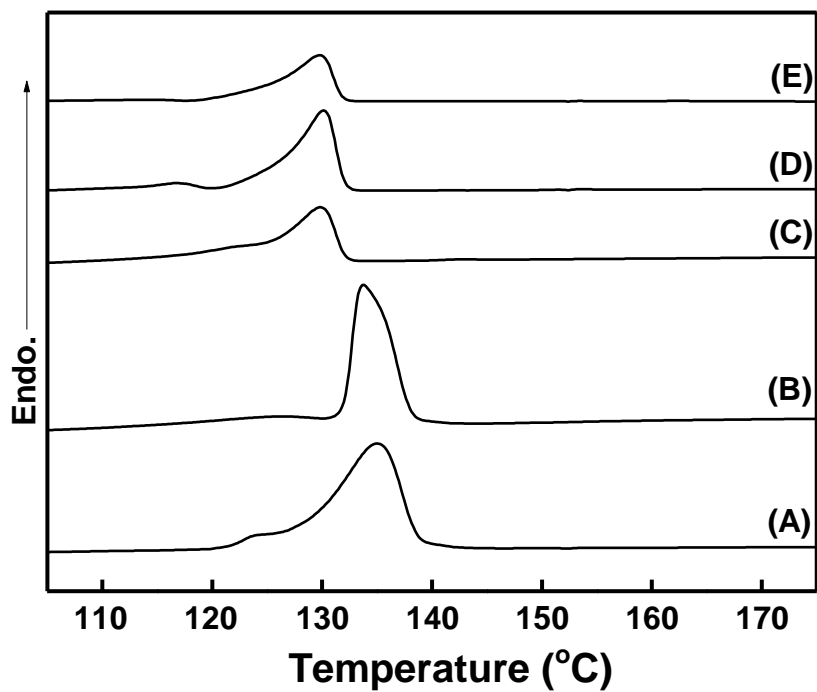

**Fig S3** DSC curves for the un-drawn SGC film annealed at 120°C (A), 130°C (B), 140°C (C), 150°C (D) and 160°C (E). Heating rate was 10°C/min.
